# Supplementary material
Source: PubMed Central journal article supplement (PMC4096110)

# A Masson's trichrome

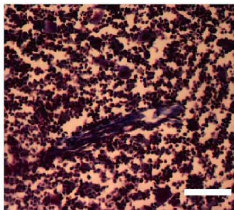

# B

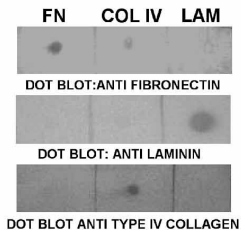

# C

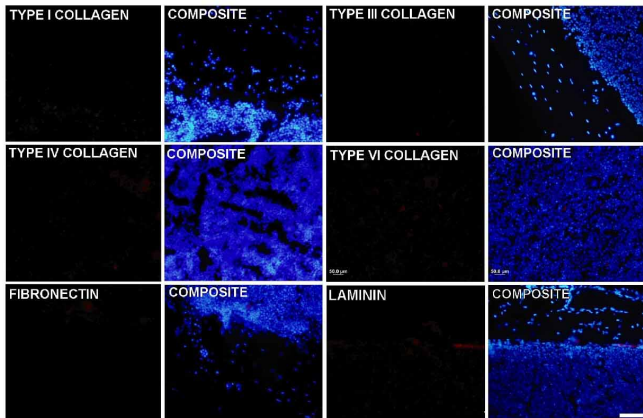

**A****COOMASSIE BLUE STAINING**

KDa

250 -

150 -

100 -

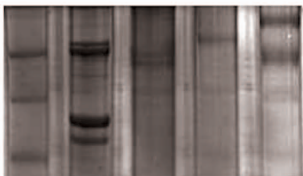

MW

1

2

3

4

**B**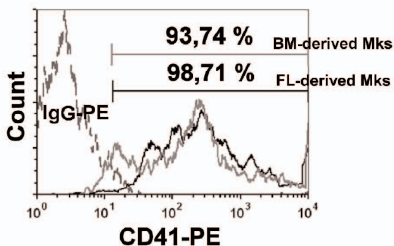**C**

BM b220 (CD45R) +

BM Mac-1 (CD11b) +

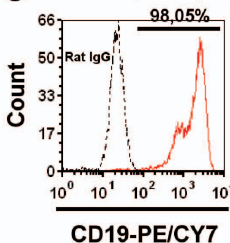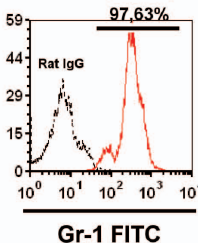

**VEGFR-3**

**Fibronectin**

**Type IV collagen**

**Laminin**

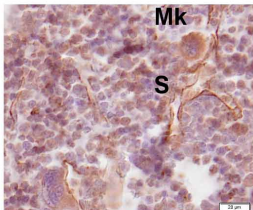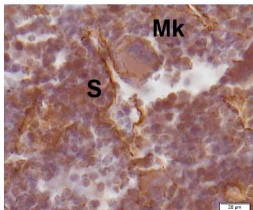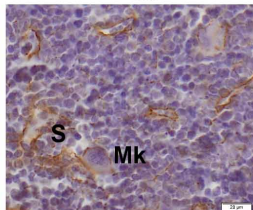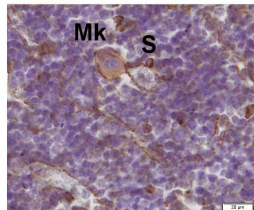

**$\alpha$ -SMA**

**Type I collagen**

**Type III collagen**

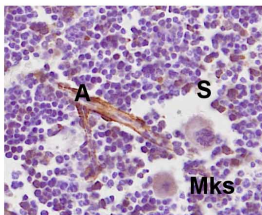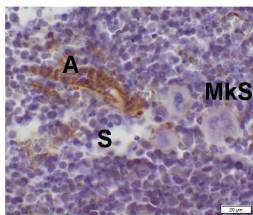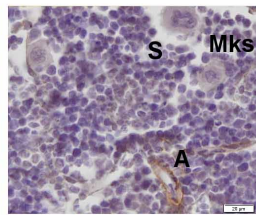

**A**

LAMININ

TYPE IV COLLAGEN

FIBRONECTIN

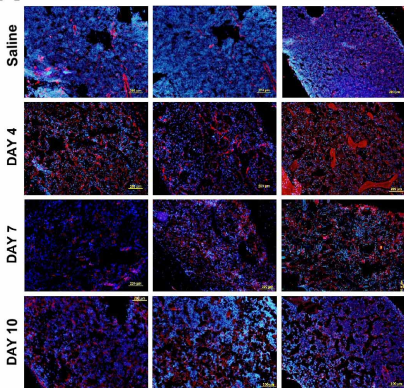**B**

72 HOURS

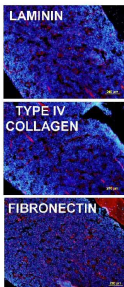**C**5-FU  
250mg/kg

kDa Saline 4 day 7 day 10 day

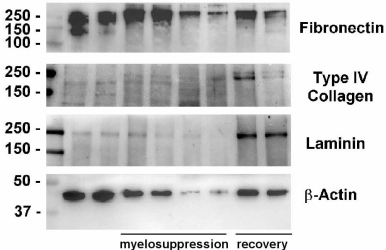

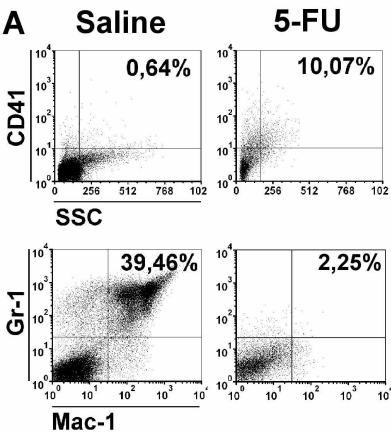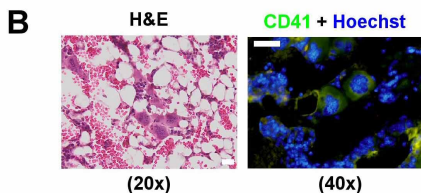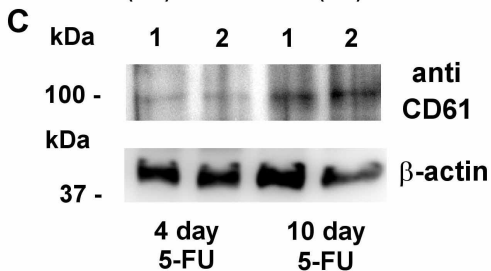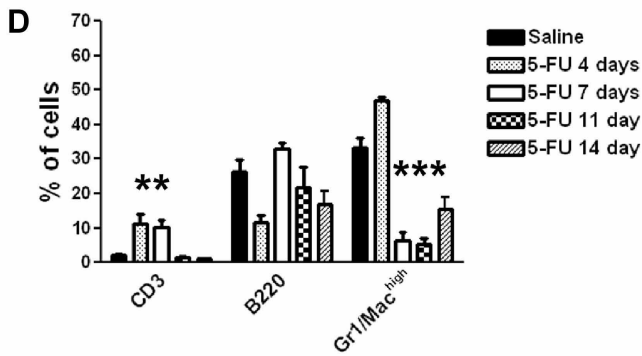

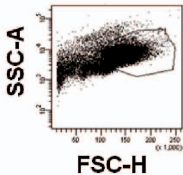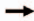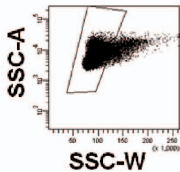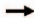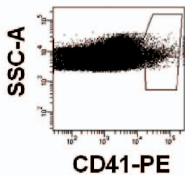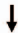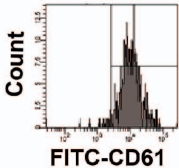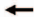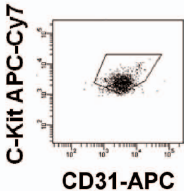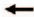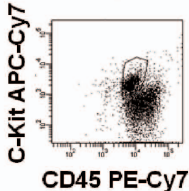

**A**

**Mk lysate**

---

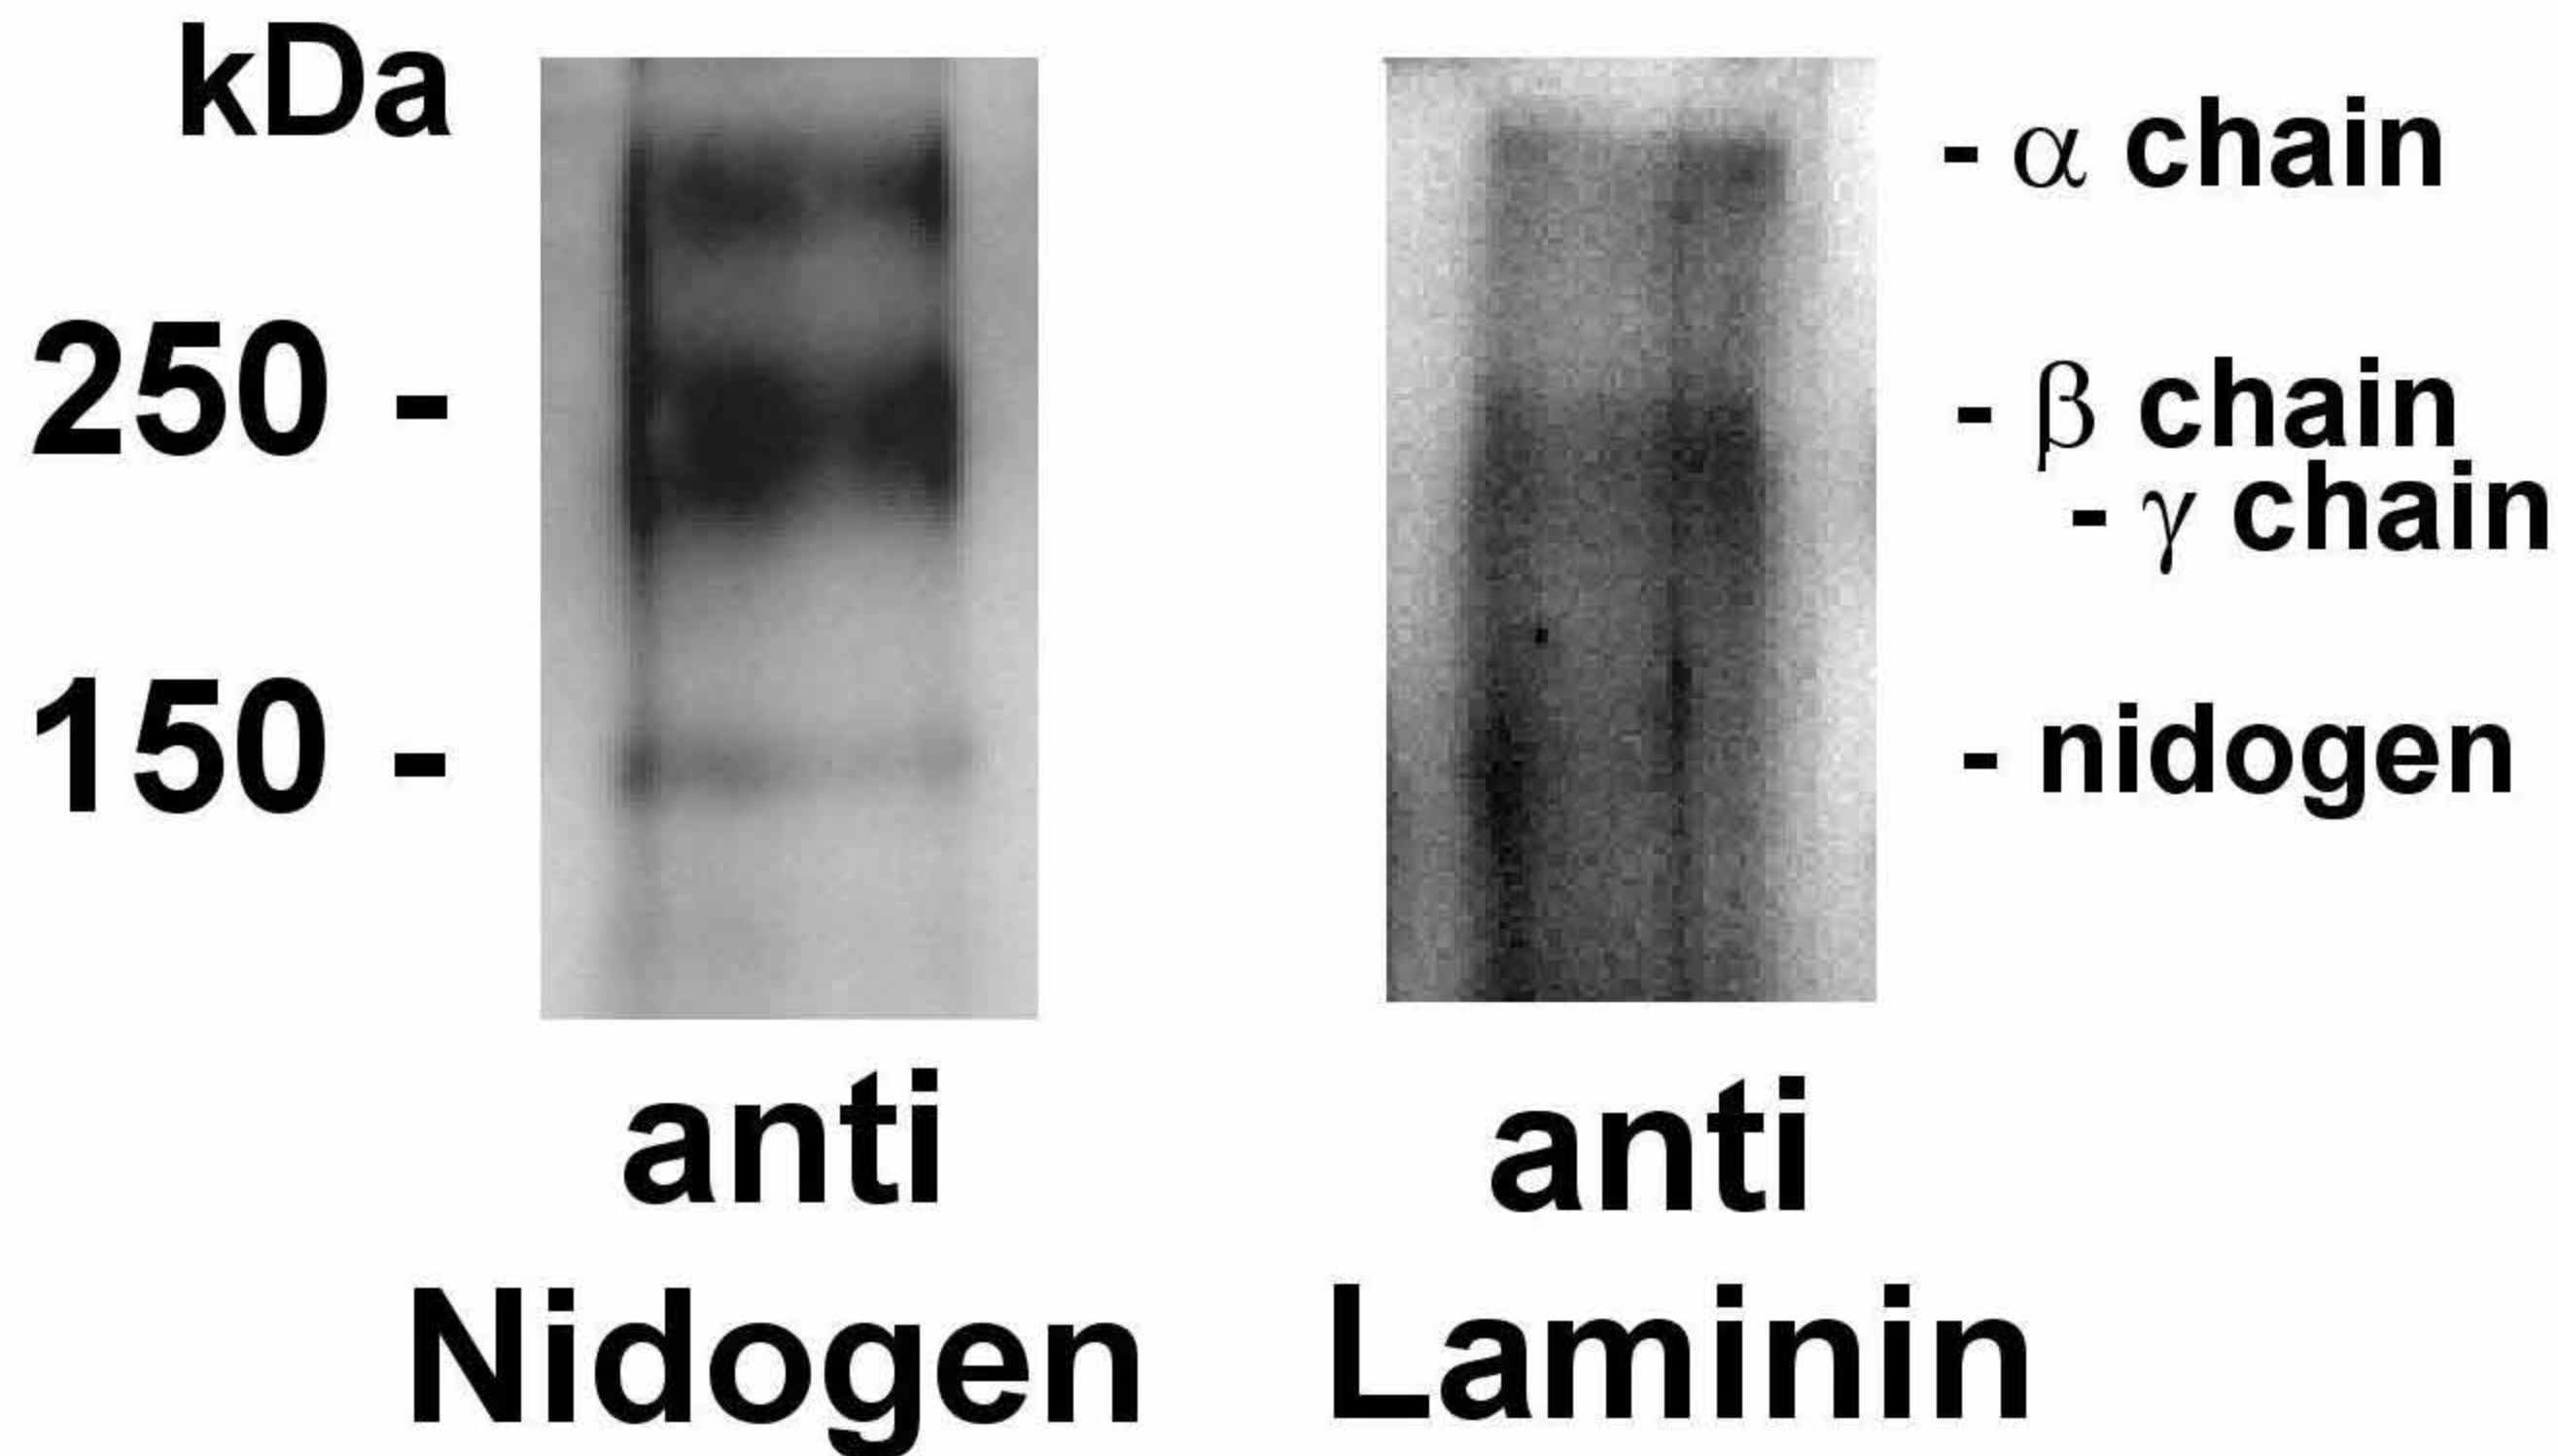

Supplement: NIHMS548777-supplement-Supp_Fig_S1-S7.pdf [file NIHMS548777-supplement-Supp_Fig_S1-S7.pdf]
